# Supplementary material for: Metal–organic framework-based CoP/reduced graphene oxide: high-performance bifunctional electrocatalyst for overall water splitting
Source: PubMed Central journal article supplement — Chem Sci. 2016 Jan 12;7(3):1690–5. doi: 10.1039/c5sc04425a (PMC5964964; doi:10.1039/c5sc04425a), 2016-01-12
Supplement: SC-007-C5SC04425A-s001.pdf [file SC-007-C5SC04425A-s001.pdf]

## Electronic Supplementary Information

### **Metal-Organic Framework-Based CoP/Reduced Graphene Oxide: High-Performance Bifunctional Electrocatalyst for Overall Water Splitting**

Long Jiao, Yu-Xiao Zhou and Hai-Long Jiang\*

Hefei National Laboratory for Physical Sciences at the Microscale, Key Laboratory of Soft Matter Chemistry, Chinese Academy of Sciences, Collaborative Innovation Center of Suzhou Nano Science and Technology, Department of Chemistry, University of Science and Technology of China, Hefei, Anhui 230026, P. R. China.

\* To whom correspondence should be addressed.

Email: [jjanglab@ustc.edu.cn](mailto:jjanglab@ustc.edu.cn)

## **Experimental Section**

**Preparation of graphene oxide (GO):** The GO was prepared using a modified Hummers and Offeman's method.<sup>1</sup> Briefly, graphite powder (5 g), NaNO<sub>3</sub> (5 g), and concentrated sulfuric acid (169 mL) were stirred in an ice bath for 15-20 min. Next, KMnO<sub>4</sub> (22.5 g) was slowly added. The solution was heated to 20 ± 5 °C in a water bath and stirred for about 2 h and a thick green viscous solid was formed during this step. After the removal of the ice bath, the mixture was stirred at room temperature for 5 days. Then, H<sub>2</sub>SO<sub>4</sub> solution (0.5%, 500 mL) was added very slowly followed by stirring for 1 h while the temperature was controlled below 98 °C. Finally, the solution of H<sub>2</sub>O<sub>2</sub> (30%) was added and the solution color turned from dark brown to pale golden yellow. The mixture was left overnight. The GO particles, settled at the bottom, were separated from the excess liquid by decantation followed by centrifugation. The solution was then washed with 500 mL water for several times to adjust its pH at 7. Then the wet form of GO was centrifuged and freeze-dried. A fine brown powder of the initial GO was obtained.

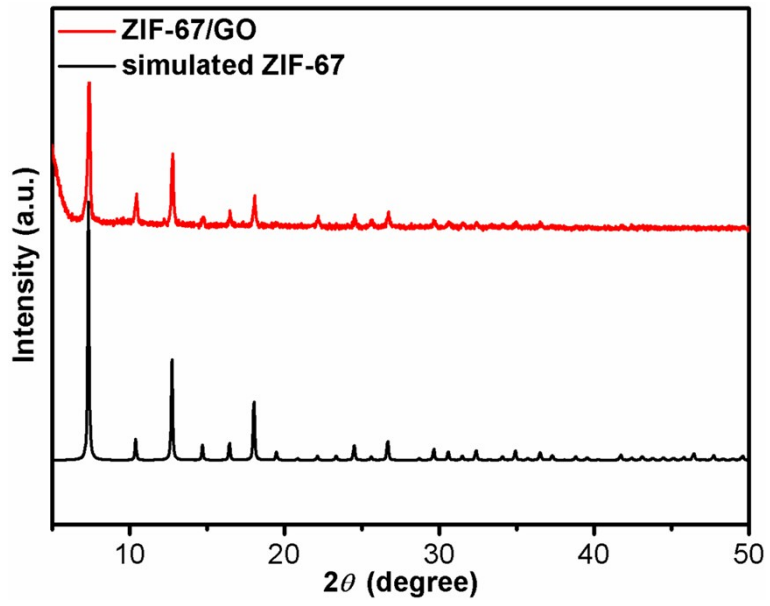

**Fig. S1** Powder XRD patterns of ZIF-67/GO and simulated ZIF-67.

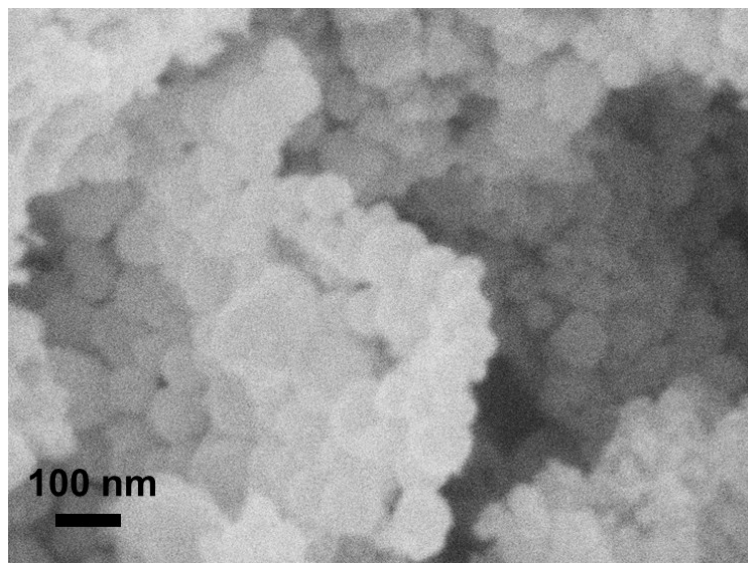

**Fig. S2** SEM image of Co<sub>3</sub>O<sub>4</sub>/rGO-400, showing the layered structure.

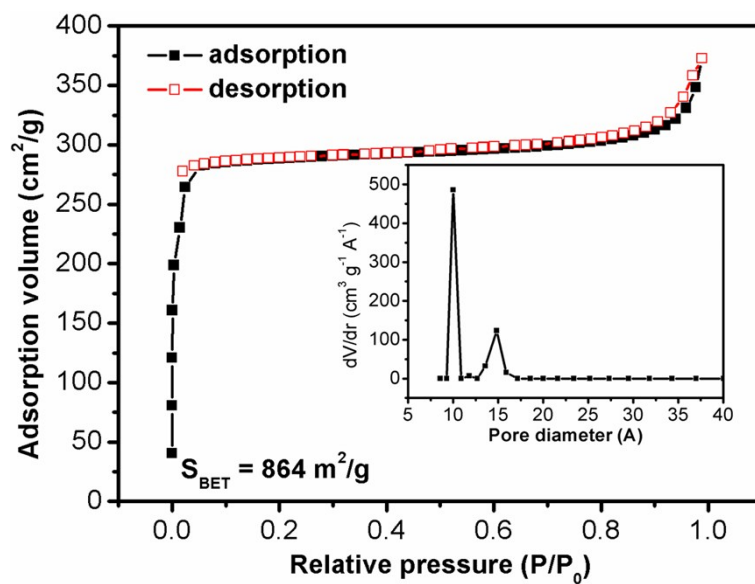

**Fig. S3**  $\text{N}_2$  adsorption/desorption isotherms of ZIF-67/GO (inset: pore size distribution analysis based on the DFT model).

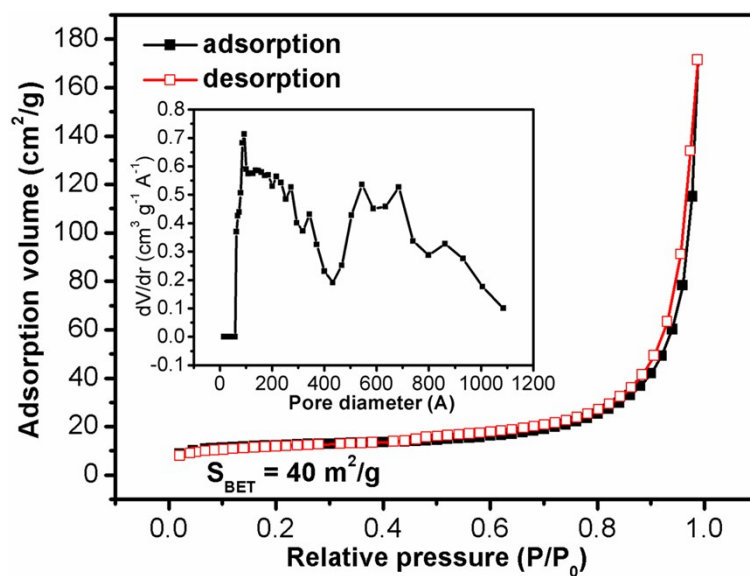

**Fig. S4**  $\text{N}_2$  adsorption/desorption isotherms of  $\text{Co}_3\text{O}_4/\text{rGO-400}$  (inset: pore size distribution analysis based on the DFT model).

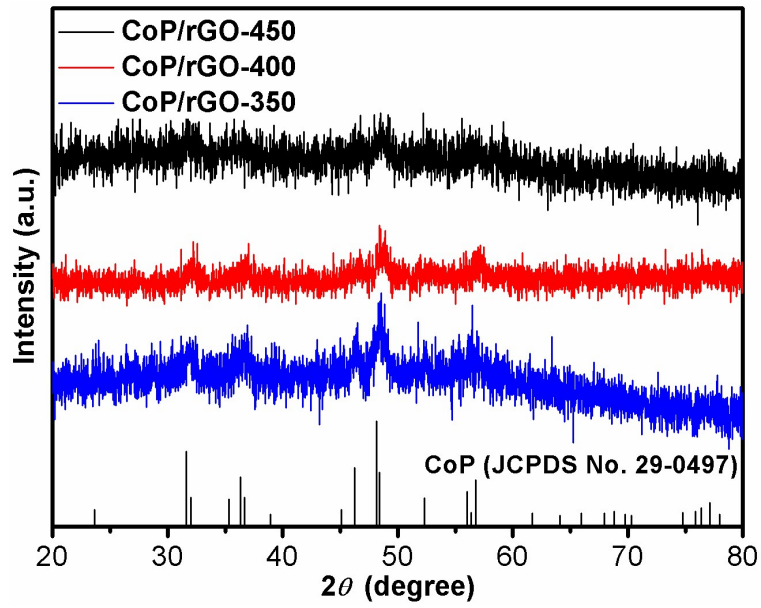

Fig. S5 Powder XRD patterns of CoP/rGO-T (T = 350, 400 and 450).

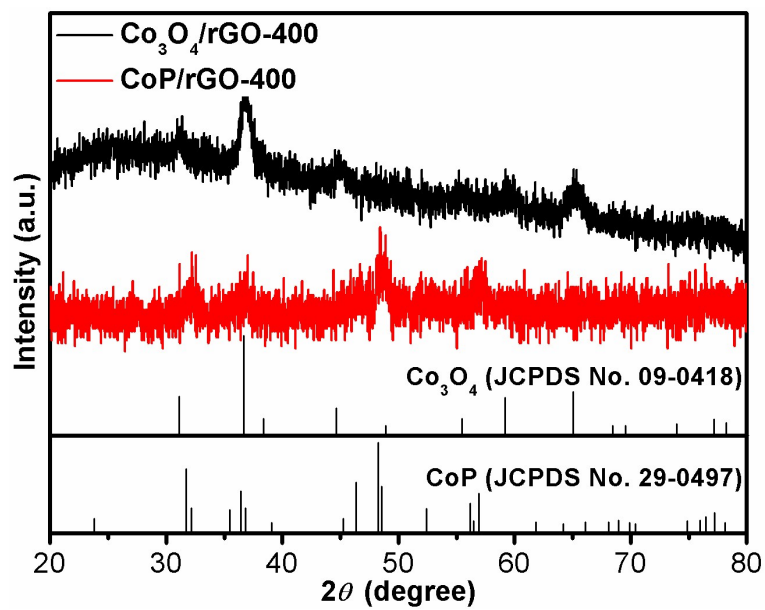

Fig. S6 Powder XRD patterns of Co<sub>3</sub>O<sub>4</sub>/rGO-400 and CoP/rGO-400.

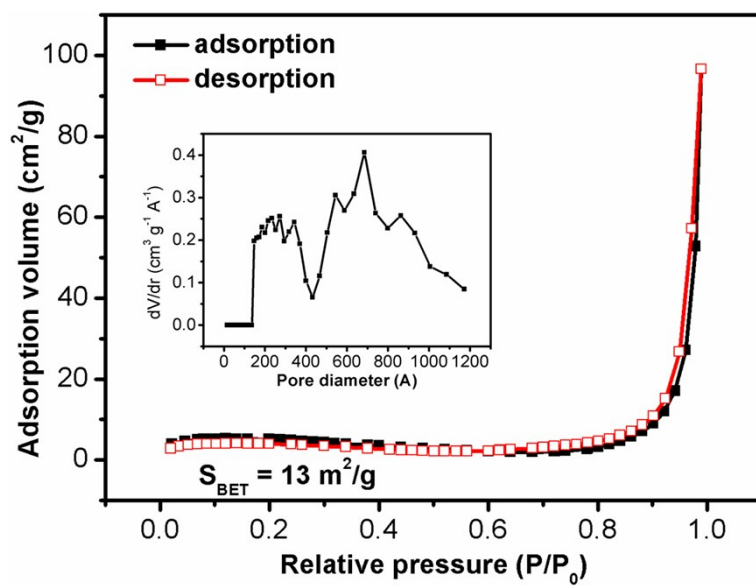

**Fig. S7** N<sub>2</sub> adsorption/desorption isotherms of CoP/rGO-400 (inset: pore size distribution analysis based on the DFT model).

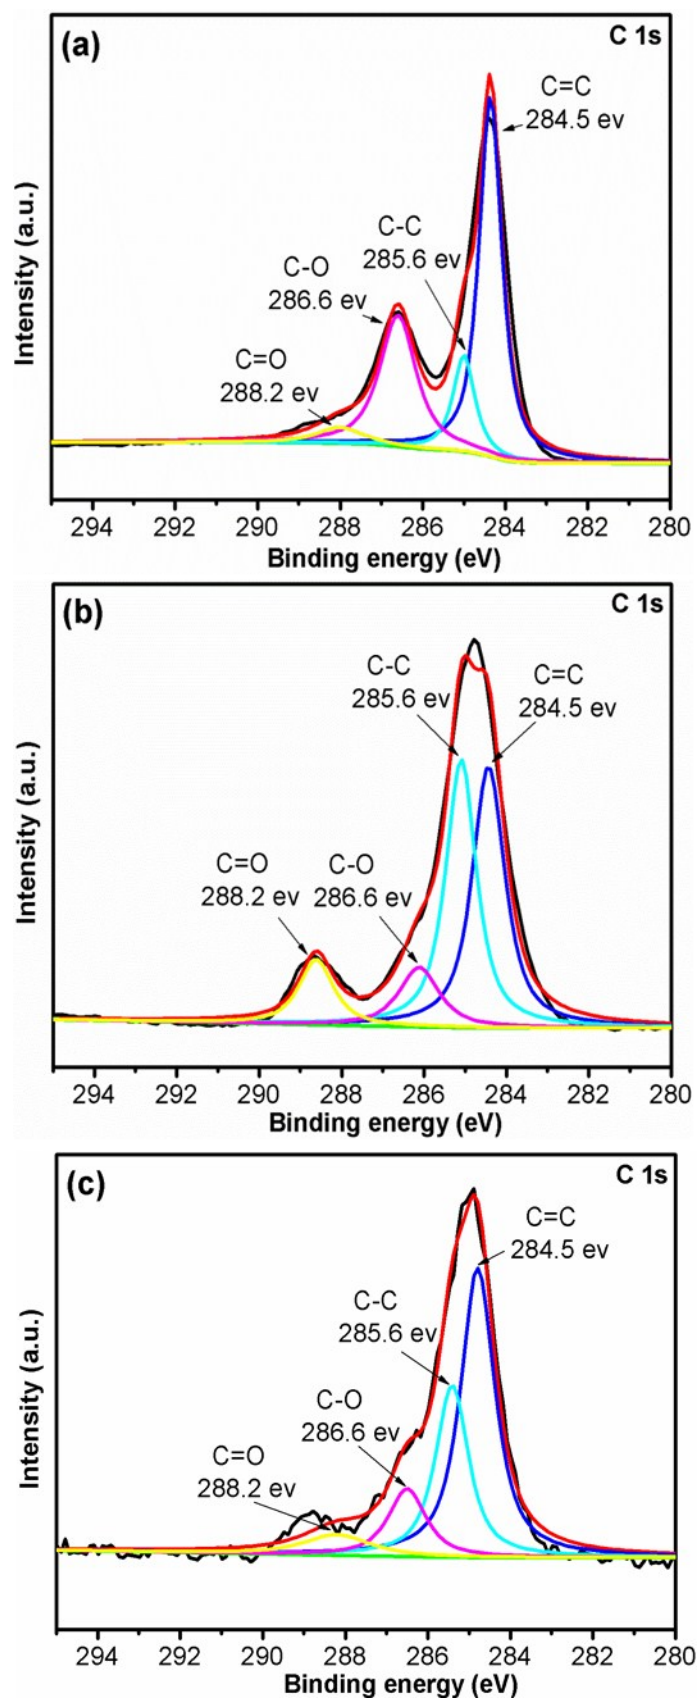

**Fig. S8** The XPS spectra of high-resolution C 1s for (a) GO, (b) Co<sub>3</sub>O<sub>4</sub>/rGO, and (c) CoP/rGO.

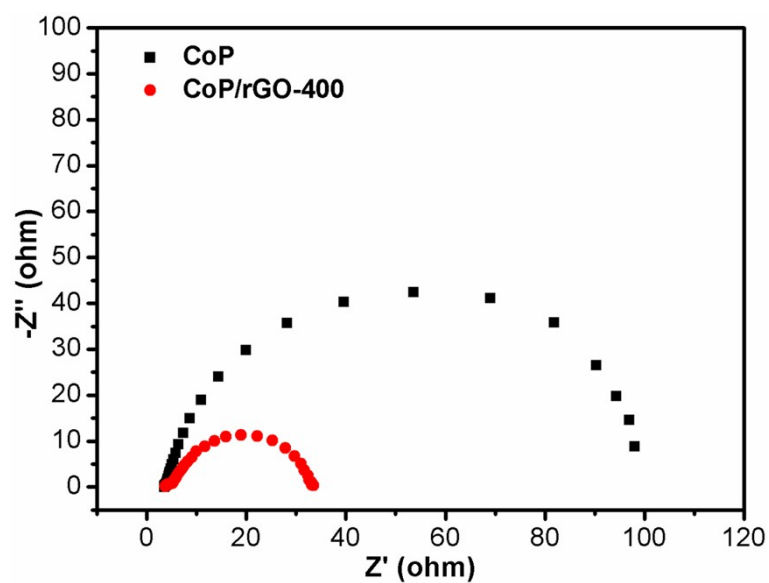

**Fig. S9** Nyquist plots of electrochemical impedance spectra of CoP/rGO-400 and CoP at -100 mV vs RHE in 1M KOH.

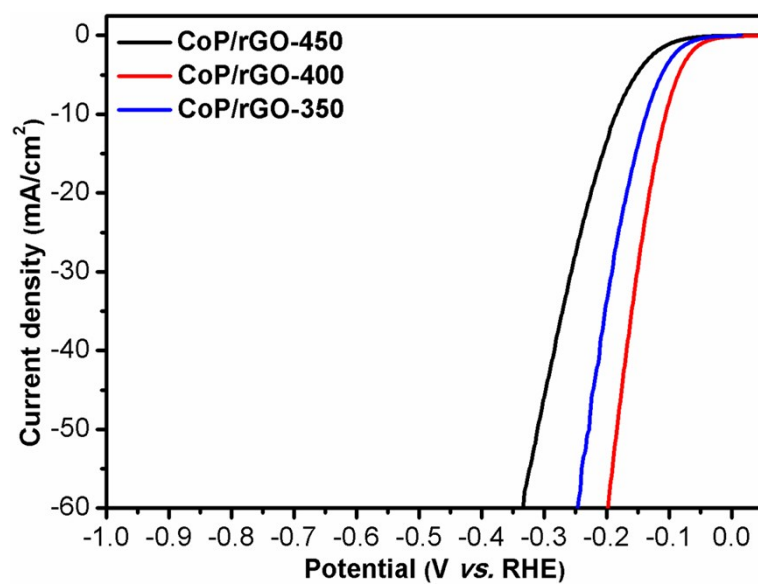

**Fig. S10** Electrochemical hydrogen evolution reaction (HER) activity for CoP/rGO-T (T = 350, 400, and 450) in 0.5M H<sub>2</sub>SO<sub>4</sub> with a scan rate of 5 mV/s.



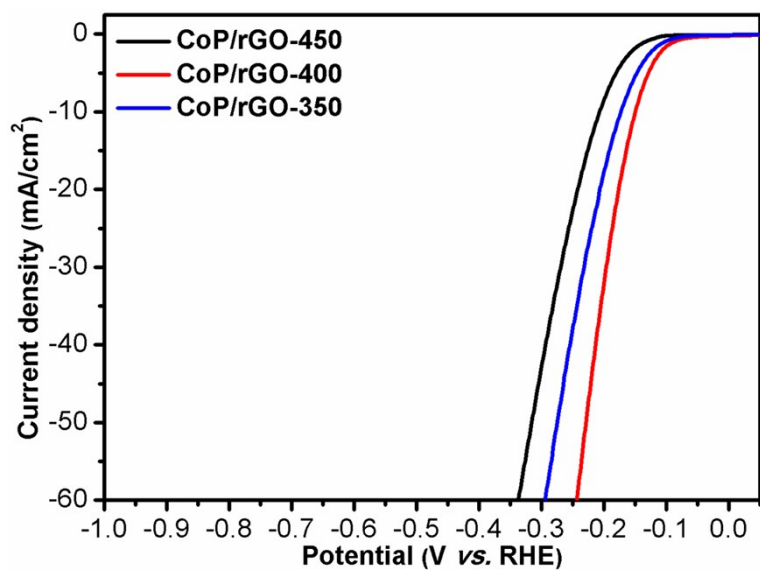

**Fig. S11** Electrochemical hydrogen evolution reaction (HER) activity of CoP/rGO-T (T = 350, 400, and 450) in 1M KOH with a scan rate of 5 mV/s.

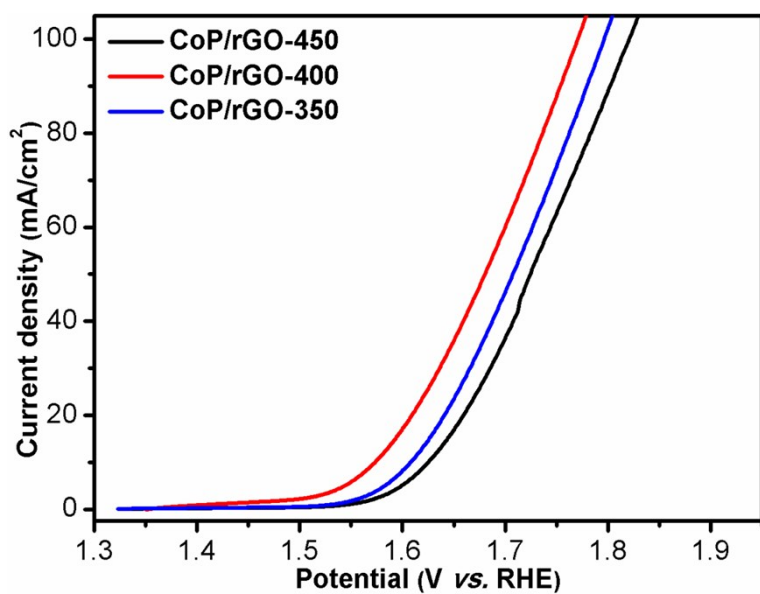

**Fig. S12** Electrochemical oxygen evolution reaction (OER) activity of CoP/rGO-T (T = 350, 400, and 450) in 1M KOH with a scan rate of 5 mV/s.

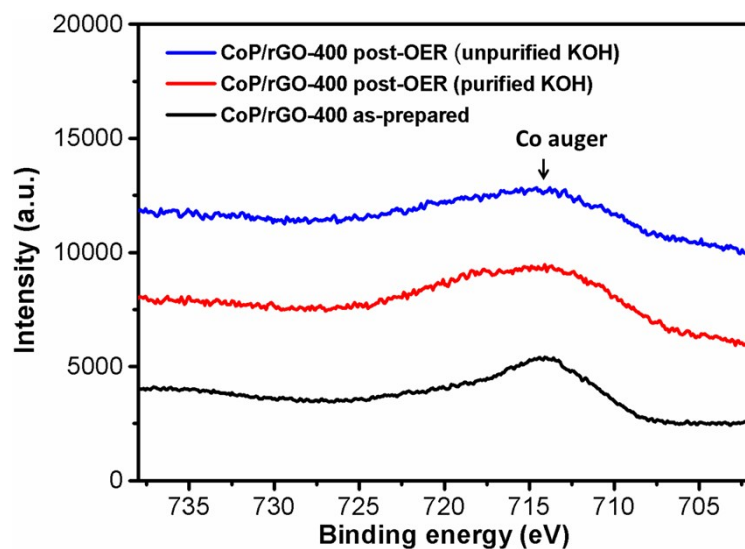

**Fig. S13** High-resolution XPS survey spectra of Fe 2p for CoP/rGO-400.

The 1 M KOH was purified as follows:  $\text{Co}(\text{OH})_2$  was precipitated from the mixture of  $\text{Co}(\text{NO}_3)_2$  (1 g) and 0.1M KOH (200 mL), and was washed three times. The triple-washed  $\text{Co}(\text{OH})_2$  was added to the 1M KOH and stirred for 10 min to absorb Fe impurities. The resultant brown suspension was centrifuged, and the obtained Fe-free KOH solution was used as electrolyte for OER.

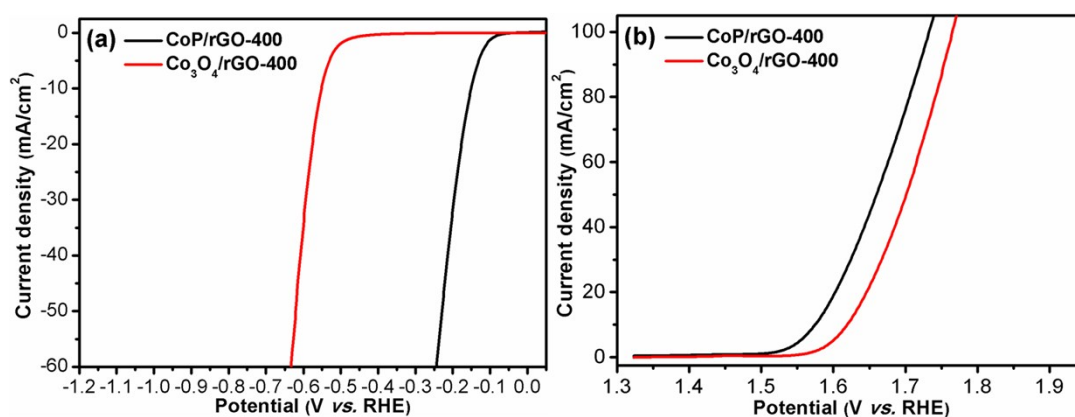

**Fig. S14** Activity comparison of electrochemical (a) hydrogen evolution reaction (HER) and (b) oxygen evolution reaction (OER) over CoP/rGO-400 and  $\text{Co}_3\text{O}_4/\text{rGO}$ -400 catalysts, respectively, in 1M KOH with a scan rate of 5 mV/s.

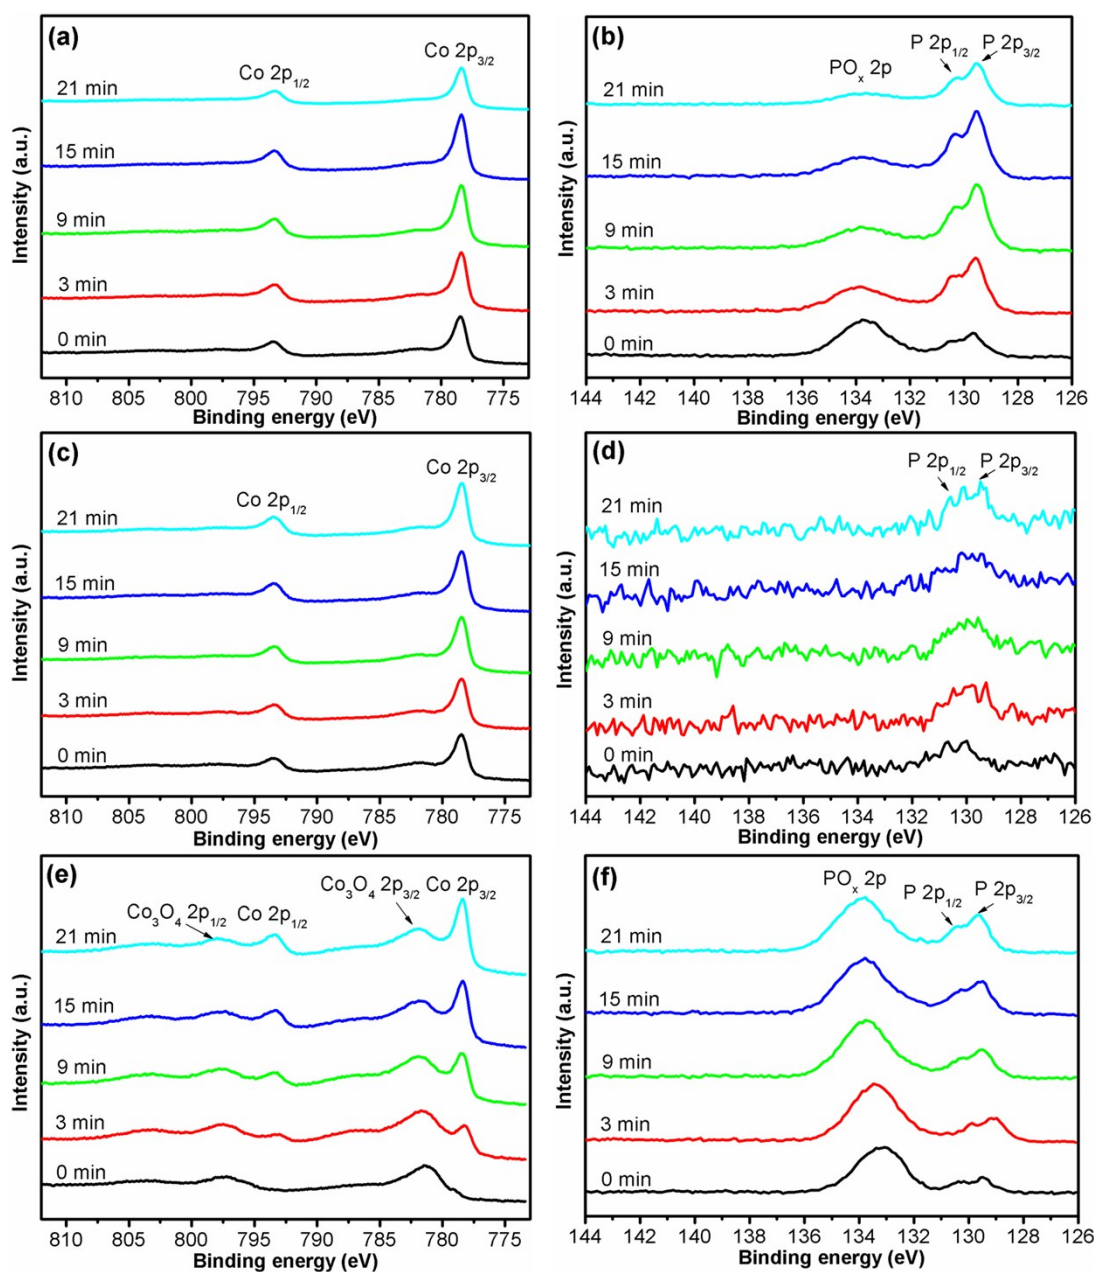

**Fig. S15** High-resolution XPS survey spectra of Co 2p for (a) as-prepared, (c) post-HER, and (e) post-OER CoP/rGO-400 catalyst, and P 2p for (b) as-prepared, (d) post-HER, and (f) post-OER CoP/rGO-400 catalyst, respectively, during Ar<sup>+</sup> sputtering for different time.

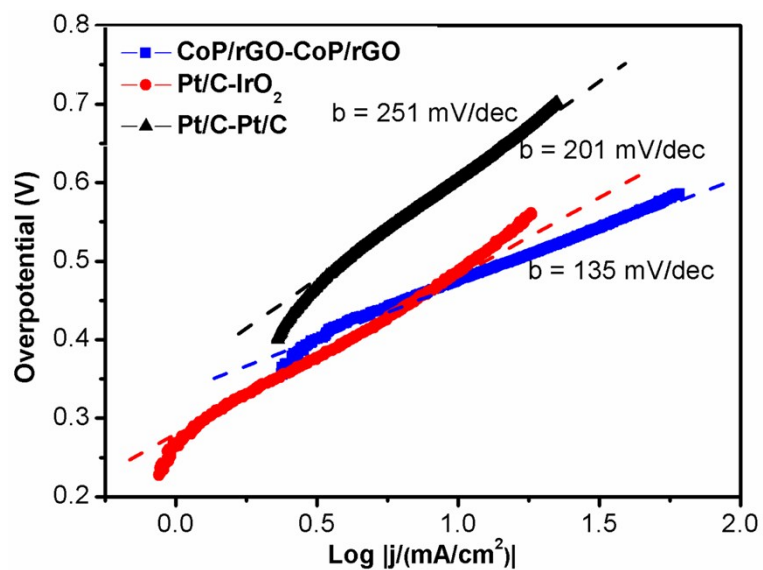

**Fig. S16** Tafel plots of integrated CoP/rGO-CoP/rGO, Pt/C-IrO<sub>2</sub> and Pt/C-Pt/C couples for overall water splitting.

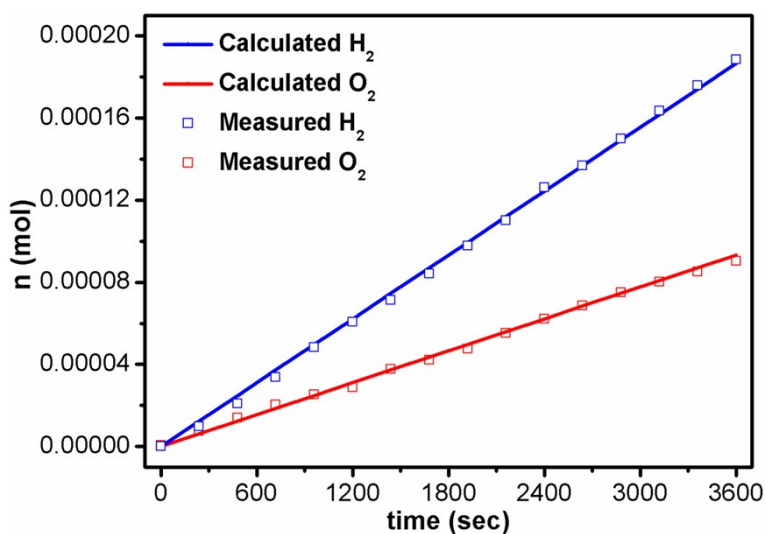

**Fig. S17** The measured and theoretical (assuming a 100% faradaic efficiency) yields of H<sub>2</sub> and O<sub>2</sub> over time during water splitting over CoP/rGO-400 catalyst in 1M KOH at a current density of 10 mA/cm<sup>2</sup>.

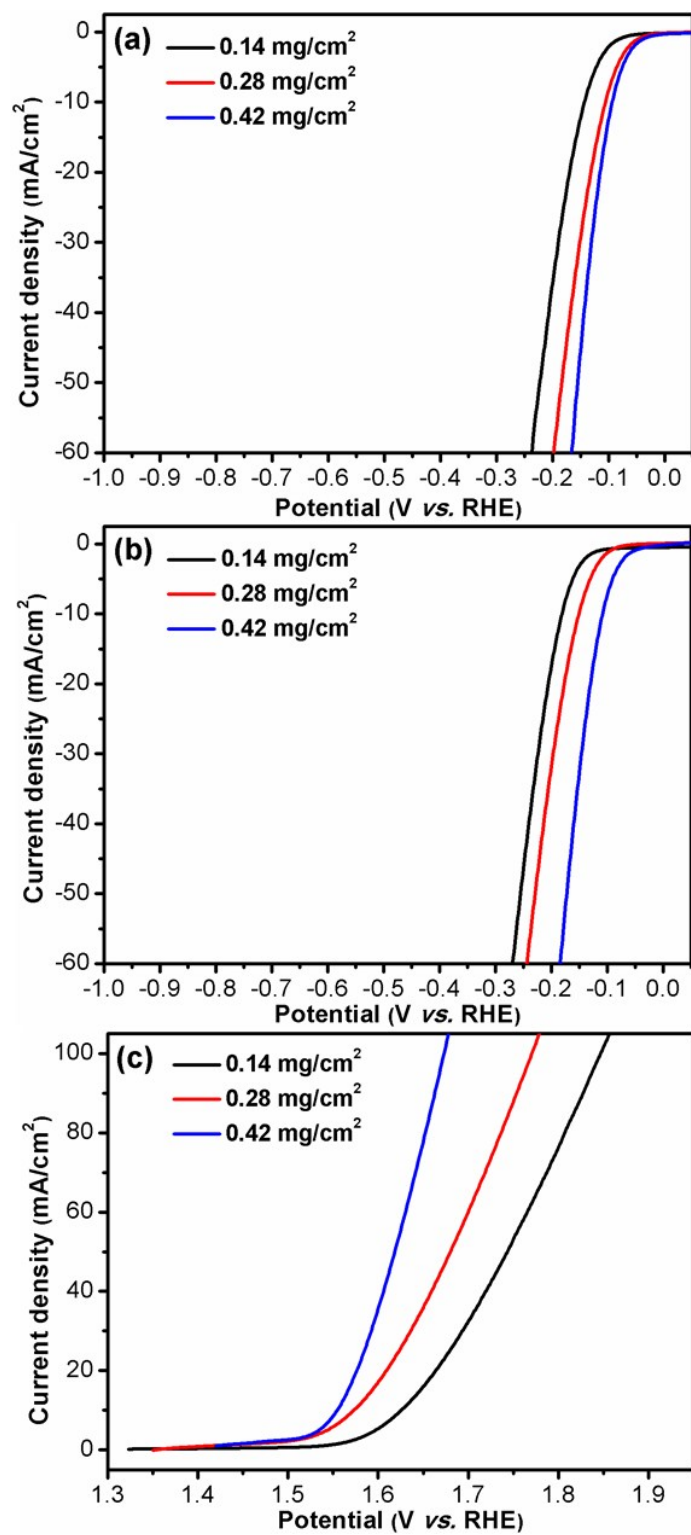

**Fig. S18** Electrochemical hydrogen evolution reaction (HER) activity in (a) 0.5M H<sub>2</sub>SO<sub>4</sub> (b) 1M KOH and (c) Electrochemical oxygen evolution reaction (OER) activity over CoP/rGO-400 at different mass loadings in 1M KOH with a scan rate of 5 mV/s.

**Table S1** Comparison of HER performance in 0.5M H<sub>2</sub>SO<sub>4</sub> solution for CoP/rGO-400 with other non-noble metal electrocatalysts.

| material                            | Current density (j, mA/cm <sup>2</sup> ) | $\eta$ at the corresponding j (mV) | Catalyst loading (mg/cm <sup>2</sup> ) | Tafel slopes(mV/dec) | Ref                                                  |
|-------------------------------------|------------------------------------------|------------------------------------|----------------------------------------|----------------------|------------------------------------------------------|
| CoP/rGO-400                         | 10                                       | 105                                | ~0.28                                  | 50                   | This work                                            |
|                                     | 20                                       | 130                                |                                        |                      |                                                      |
| CoP/CNT                             | 2                                        | 70                                 | 0.285                                  | 54                   | <i>Angew. Chem., Int. Ed.</i> <b>2014</b> , 53, 6710 |
|                                     | 10                                       | 122                                |                                        |                      |                                                      |
| CoP/CC                              | 10                                       | 67                                 | 0.92                                   | 51                   | <i>J. Am. Chem. Soc.</i> <b>2014</b> , 136, 7587     |
|                                     | 20                                       | 100                                |                                        |                      |                                                      |
| Co <sub>2</sub> P nanorods          | 10                                       | 134                                | 1                                      | 71                   | <i>Nano Energy</i> <b>2014</b> , 9, 373              |
|                                     | 20                                       | 167                                |                                        |                      |                                                      |
| CoP/RGO-0.36                        | 10                                       | ~250                               | 0.29                                   | 104.8                | <i>J. Mater. Chem. A</i> <b>2015</b> , 3, 5337       |
| CoP@C                               | 10                                       | 170                                | 0.353                                  | 61                   | <i>J. Power Source</i> <b>2015</b> , 286, 464        |
| Ni <sub>12</sub> P <sub>5</sub> /Ti | 10                                       | 137                                | 1                                      | 63                   | <i>ACS nano</i> <b>2014</b> , 8, 8121                |
| Cu <sub>3</sub> P NW/CF             | 10                                       | 143                                | 15.2                                   | 67                   | <i>Angew. Chem., Int. Ed.</i> <b>2014</b> , 53, 9577 |
| MoCx                                | 10                                       | 142                                | 0.8                                    | 53                   | <i>Nat. Commun.</i> <b>2015</b> , 6, 6512            |
| CoNi@NC                             | 10                                       | 142                                | 1.6                                    | 104                  | <i>Angew. Chem., Int. Ed.</i> <b>2015</b> , 54, 2100 |

**Table S2** Comparison of HER performance in 1M KOH solution for CoP/rGO-400 with other non-noble metal electrocatalysts.

| material                   | Current density (j, mA/cm <sup>2</sup> ) | $\eta$ at the correspondin g j (mV) | Catalyst loading (mg/cm <sup>2</sup> ) | Tafel slopes (mV/dec) | Ref                                                           |
|----------------------------|------------------------------------------|-------------------------------------|----------------------------------------|-----------------------|---------------------------------------------------------------|
| CoP/rGO-400                | 10                                       | 150                                 | ~0.28                                  | 38                    | This work                                                     |
|                            | 20                                       | 175                                 |                                        |                       |                                                               |
| MoB                        | 10                                       | 225                                 | 2.3                                    | 59                    | <i>Angew. Chem., Int. Ed.</i> <b>2012</b> , <i>51</i> , 12703 |
| Ni                         | 10                                       | 400                                 | 1                                      | -                     | <i>ACS Catal.</i> <b>2013</b> , <i>3</i> , 166                |
| CoP/CC                     | 10                                       | 209                                 | 0.92                                   | 129                   | <i>J. Am. Chem. Soc.</i> <b>2014</b> , <i>136</i> , 7587      |
| Co <sub>2</sub> P nanorods | 20                                       | 171                                 | 1                                      | -                     | <i>Nano Energy</i> <b>2014</b> , <i>9</i> , 373               |
| MoC <sub>x</sub>           | 10                                       | 151                                 | 0.8                                    | 59                    | <i>Nat. Commun.</i> <b>2015</b> , <i>6</i> , 6512             |
| Co-embedded N-rich CNTs    | 10                                       | 370                                 | 0.28                                   | -                     | <i>Angew. Chem., Int. Ed.</i> <b>2014</b> , <i>53</i> , 4372  |

**Table S3** Comparison of OER performance in 1M KOH solution for CoP/rGO-400 with other non-noble metal electrocatalysts.

| material                                                        | Current density (j, mA/cm <sup>2</sup> ) | $\eta$ at the corresponding j (mV) | Catalyst loading (mg/cm <sup>2</sup> ) | Tafel slopes (mV/dec) | Ref                                              |
|-----------------------------------------------------------------|------------------------------------------|------------------------------------|----------------------------------------|-----------------------|--------------------------------------------------|
| <b>CoP/rGO-400</b>                                              | <b>10</b>                                | <b>340</b>                         | <b>~0.28</b>                           | <b>66</b>             | <b>This work</b>                                 |
|                                                                 | <b>20</b>                                | <b>379</b>                         |                                        |                       |                                                  |
| CoP Nanoparticles (0.1M KOH)                                    | 10                                       | 360                                | 0.05                                   | 66                    | <i>ACS Catal.</i> <b>2015</b> , 5, 4066          |
| N-doped graphene-CoO                                            | 10                                       | 340                                | 0.7                                    | 71                    | <i>Energy Environ. Sci.</i> <b>2014</b> , 7, 609 |
| Zn <sub>x</sub> Co <sub>3-x</sub> O <sub>4</sub> nanowire array | 10                                       | 320                                | ~1                                     | 51                    | <i>Chem. Mater.</i> <b>2014</b> , 26, 1889       |
| NiCo LDH nanosheets                                             | 10                                       | 367                                | 0.17                                   | 40                    | <i>Nano Lett.</i> <b>2015</b> , 15, 1421         |



**Table S4** Comparison of OER and HER performance in 1M KOH solution for CoP/rGO-400 with other non-noble metal bifunctional electrocatalysts.

| material                       | $\eta_{\text{HER@10mA/cm}^2}$ (mV) | $\eta_{\text{OER@10mA/cm}^2}$ (mV) | E (V) <sup>[a]</sup> | Ref                                                   |
|--------------------------------|------------------------------------|------------------------------------|----------------------|-------------------------------------------------------|
| <b>CoP/GO-400</b>              | <b>150</b>                         | <b>340</b>                         | <b>1.70</b>          | <b>This work</b>                                      |
| Ni <sub>5</sub> P <sub>4</sub> | 150                                | 290                                | ~1.7                 | <i>Angew. Chem., Int. Ed.</i> <b>2015</b> , 54, 12361 |
| NiFe LDH/Ni foam               | 210                                | 240                                | 1.7                  | <i>Science</i> <b>2014</b> , 345, 1593                |
| PCPTF                          | ~380                               | ~310                               | -                    | <i>Adv. Mater.</i> <b>2015</b> , 27, 3175             |
| Co-P film                      | 94                                 | 345                                | ~1.64                | <i>Angew. Chem., Int. Ed.</i> <b>2015</b> , 54, 6251  |
| NiSe/Ni foam                   | 96                                 | -                                  | 1.63                 | <i>Angew. Chem., Int. Ed.</i> <b>2015</b> , 54, 9351  |

**Note:** <sup>[a]</sup>represents the overall water splitting overpotential at 10 mA/cm<sup>2</sup>.

## References

1. M. Jahan, Z. Liu and K. P. Loh, *Adv. Funct. Mater.*, 2013, **23**, 5363.
